# Supplementary material
Source: publisher figshare collection journal article supplement (https://acs.figshare.com/ndownloader/files/5341141)
Supplement: Supplementary file 1 [file 5341141]

 
data_paco1s 
 
_audit_creation_method            SHELXL-97 
_chemical_name_systematic 
; 
 ? 
; 
_chemical_name_common             ? 
_chemical_melting_point           ? 
_chemical_formula_moiety          ? 
_chemical_formula_sum 
 'C19 H25 N3 O9 Pd' 
_chemical_formula_weight          545.82 
 
loop_ 
 _atom_type_symbol 
 _atom_type_description 
 _atom_type_scat_dispersion_real 
 _atom_type_scat_dispersion_imag 
 _atom_type_scat_source 
 'C'  'C'   0.0033   0.0016 
 'International Tables Vol C Tables 4.2.6.8 and 6.1.1.4' 
 'H'  'H'   0.0000   0.0000 
 'International Tables Vol C Tables 4.2.6.8 and 6.1.1.4' 
 'N'  'N'   0.0061   0.0033 
 'International Tables Vol C Tables 4.2.6.8 and 6.1.1.4' 
 'O'  'O'   0.0106   0.0060 
 'International Tables Vol C Tables 4.2.6.8 and 6.1.1.4' 
 'Pd'  'Pd'  -0.9988   1.0072 
 'International Tables Vol C Tables 4.2.6.8 and 6.1.1.4' 
 
_symmetry_cell_setting            monoclinic
_symmetry_space_group_name_H-M    'P 2(1)/n' 
 
loop_ 
 _symmetry_equiv_pos_as_xyz 
 'x, y, z' 
 '-x+1/2, y+1/2, -z+1/2' 
 '-x, -y, -z' 
 'x-1/2, -y-1/2, z-1/2' 
 
_cell_length_a                    16.322(2) 
_cell_length_b                    8.2938(11) 
_cell_length_c                    18.474(2) 
_cell_angle_alpha                 90.00 
_cell_angle_beta                  112.011(2) 
_cell_angle_gamma                 90.00 
_cell_volume                      2318.5(5) 
_cell_formula_units_Z             4 
_cell_measurement_temperature     100(2) 
_cell_measurement_reflns_used     5076 
_cell_measurement_theta_min       2.38 
_cell_measurement_theta_max       28.07 
 
_exptl_crystal_description        prism 
_exptl_crystal_colour             colourless 
_exptl_crystal_size_max           0.24 
_exptl_crystal_size_mid           0.12 
_exptl_crystal_size_min           0.08 
_exptl_crystal_density_meas       ? 
_exptl_crystal_density_diffrn     1.564 
_exptl_crystal_density_method     'not measured' 
_exptl_crystal_F_000              1112 
_exptl_absorpt_coefficient_mu     0.853 
_exptl_absorpt_correction_type    multi-scan 
_exptl_absorpt_correction_T_min   0.8214 
_exptl_absorpt_correction_T_max   0.9349 
_exptl_absorpt_process_details    SADABS
 
_exptl_special_details 
; 
 ? 
; 
 
_diffrn_ambient_temperature       100(2) 
_diffrn_radiation_wavelength      0.71073 
_diffrn_radiation_type            MoK\a 
_diffrn_radiation_source          'fine-focus sealed tube' 
_diffrn_radiation_monochromator   graphite 
_diffrn_measurement_device_type   'Bruker SMART APEX'
_diffrn_measurement_method        \w-scan
_diffrn_detector_area_resol_mean  8.26
_diffrn_standards_number          ? 
_diffrn_standards_interval_count  ? 
_diffrn_standards_interval_time   ? 
_diffrn_standards_decay_%         ? 
_diffrn_reflns_number             24490 
_diffrn_reflns_av_R_equivalents   0.0406 
_diffrn_reflns_av_sigmaI/netI     0.0362 
_diffrn_reflns_limit_h_min        -21 
_diffrn_reflns_limit_h_max        20 
_diffrn_reflns_limit_k_min        -10 
_diffrn_reflns_limit_k_max        11 
_diffrn_reflns_limit_l_min        -24 
_diffrn_reflns_limit_l_max        24 
_diffrn_reflns_theta_min          2.10 
_diffrn_reflns_theta_max          28.17 
_reflns_number_total              5320 
_reflns_number_gt                 4606 
_reflns_threshold_expression      >2sigma(I) 
 
_computing_data_collection        'Bruker SMART'
_computing_cell_refinement        'Bruker SAINT'  
_computing_data_reduction         'Bruker SAINT' 
_computing_structure_solution     'SHELXS-97 (Sheldrick, 1990)' 
_computing_structure_refinement   'SHELXL-97 (Sheldrick, 1997)' 
_computing_molecular_graphics     'Bruker SHELXTL'
_computing_publication_material   'Bruker SHELXTL' 
 
_refine_special_details 
; 
 Refinement of F^2^ against ALL reflections.  The weighted R-factor wR and 
 goodness of fit S are based on F^2^, conventional R-factors R are based 
 on F, with F set to zero for negative F^2^. The threshold expression of 
 F^2^ > 2sigma(F^2^) is used only for calculating R-factors(gt) etc. and is 
 not relevant to the choice of reflections for refinement.  R-factors based 
 on F^2^ are statistically about twice as large as those based on F, and R- 
 factors based on ALL data will be even larger. 
One of the nitro group is disordered over two positions, ca 60:40%.
; 
 
_refine_ls_structure_factor_coef  Fsqd  
_refine_ls_matrix_type            full 
_refine_ls_weighting_scheme       calc  
_refine_ls_weighting_details 
 'calc w=1/[\s^2^(Fo^2^)+(0.0372P)^2^+0.6529P] where P=(Fo^2^+2Fc^2^)/3' 
_atom_sites_solution_primary      direct 
_atom_sites_solution_secondary    difmap 
_atom_sites_solution_hydrogens    geom 
_refine_ls_hydrogen_treatment     'rigid methyls, others riding' 
_refine_ls_extinction_method      none 
_refine_ls_extinction_coef        ? 
_refine_ls_number_reflns          5320 
_refine_ls_number_parameters      296 
_refine_ls_number_restraints      6 
_refine_ls_R_factor_all           0.0389 
_refine_ls_R_factor_gt            0.0306 
_refine_ls_wR_factor_ref          0.0726 
_refine_ls_wR_factor_gt           0.0697 
_refine_ls_goodness_of_fit_ref    1.046 
_refine_ls_restrained_S_all       1.065 
_refine_ls_shift/su_max           0.003 
_refine_ls_shift/su_mean          0.000 
 
loop_ 
 _atom_site_label 
 _atom_site_type_symbol 
 _atom_site_fract_x 
 _atom_site_fract_y 
 _atom_site_fract_z 
 _atom_site_U_iso_or_equiv 
 _atom_site_adp_type 
 _atom_site_occupancy 
 _atom_site_symmetry_multiplicity 
 _atom_site_calc_flag 
 _atom_site_refinement_flags 
 _atom_site_disorder_assembly 
 _atom_site_disorder_group 
Pd1 Pd 0.317228(11) 0.634431(19) 0.534755(9) 0.01488(6) Uani 1 1 d . A . 
N1 N 0.35146(13) 0.9409(2) 0.45725(11) 0.0189(4) Uani 1 1 d . . . 
O1 O 0.28002(10) 0.44214(19) 0.58121(9) 0.0193(3) Uani 1 1 d . . . 
O2 O 0.44883(11) 0.5827(2) 0.59167(9) 0.0207(3) Uani 1 1 d . . . 
N3 N 0.17117(13) 0.7115(2) 0.60609(10) 0.0186(4) Uani 1 1 d . . . 
O3 O 0.23859(11) 0.7883(2) 0.64193(9) 0.0255(4) Uani 1 1 d . . . 
O4 O 0.13293(12) 0.6252(2) 0.63697(9) 0.0276(4) Uani 1 1 d . . . 
N2 N 0.19376(14) 0.6388(2) 0.34960(11) 0.0214(4) Uani 1 1 d D . . 
O5 O 0.2223(4) 0.5061(4) 0.3542(3) 0.0291(12) Uiso 0.600(13) 1 d PD A 1 
O6 O 0.2096(3) 0.7534(5) 0.3104(2) 0.0205(10) Uiso 0.600(13) 1 d PD A 1 
O5' O 0.1850(6) 0.4856(6) 0.3333(4) 0.0324(18) Uiso 0.400(13) 1 d PD A 2 
O6' O 0.2270(5) 0.7213(9) 0.3205(4) 0.0281(17) Uiso 0.400(13) 1 d PD A 2 
O7 O 0.02225(11) 0.71965(19) 0.28017(8) 0.0194(3) Uani 1 1 d . A . 
O8 O -0.08038(10) 0.8154(2) 0.37009(9) 0.0205(3) Uani 1 1 d . . . 
O9 O -0.00077(11) 0.8107(2) 0.52984(9) 0.0196(3) Uani 1 1 d . A . 
C1 C 0.33357(16) 0.3483(3) 0.63207(12) 0.0179(5) Uani 1 1 d . . . 
C2 C 0.42533(16) 0.3553(3) 0.66029(12) 0.0183(5) Uani 1 1 d . . . 
H2 H 0.4562 0.2769 0.6982 0.022 Uiso 1 1 calc R . . 
C3 C 0.47704(15) 0.4656(3) 0.63887(12) 0.0179(5) Uani 1 1 d . . . 
C4 C 0.28952(17) 0.2189(3) 0.66114(15) 0.0295(6) Uani 1 1 d . . . 
H4A H 0.2378 0.2639 0.6687 0.044 Uiso 1 1 calc R . . 
H4B H 0.3312 0.1768 0.7109 0.044 Uiso 1 1 calc R . . 
H4C H 0.2708 0.1313 0.6228 0.044 Uiso 1 1 calc R . . 
C5 C 0.57586(16) 0.4489(3) 0.67389(16) 0.0287(6) Uani 1 1 d . . . 
H5A H 0.5981 0.4262 0.6325 0.043 Uiso 1 1 calc R . . 
H5B H 0.5919 0.3601 0.7116 0.043 Uiso 1 1 calc R . . 
H5C H 0.6020 0.5494 0.7004 0.043 Uiso 1 1 calc R . . 
C6 C 0.34155(15) 0.8258(3) 0.48710(12) 0.0171(5) Uani 1 1 d . . . 
C7 C 0.35613(16) 1.0850(3) 0.41227(13) 0.0197(5) Uani 1 1 d . . . 
C8 C 0.2614(2) 1.1305(3) 0.36254(18) 0.0381(7) Uani 1 1 d . . . 
H8A H 0.2327 1.0406 0.3279 0.057 Uiso 1 1 calc R . . 
H8B H 0.2613 1.2258 0.3312 0.057 Uiso 1 1 calc R . . 
H8C H 0.2290 1.1546 0.3965 0.057 Uiso 1 1 calc R . . 
C9 C 0.4078(2) 1.0396(3) 0.36197(16) 0.0377(7) Uani 1 1 d . . . 
H9A H 0.4663 0.9994 0.3953 0.056 Uiso 1 1 calc R . . 
H9B H 0.4146 1.1348 0.3333 0.056 Uiso 1 1 calc R . . 
H9C H 0.3759 0.9555 0.3249 0.056 Uiso 1 1 calc R . . 
C10 C 0.4020(2) 1.2173(3) 0.47018(15) 0.0349(7) Uani 1 1 d . . . 
H10A H 0.3685 1.2394 0.5034 0.052 Uiso 1 1 calc R . . 
H10B H 0.4051 1.3154 0.4418 0.052 Uiso 1 1 calc R . . 
H10C H 0.4619 1.1823 0.5027 0.052 Uiso 1 1 calc R . . 
C11 C 0.18910(15) 0.6877(3) 0.47998(12) 0.0152(4) Uani 1 1 d . . . 
C12 C 0.13407(15) 0.7223(3) 0.52000(11) 0.0151(4) Uani 1 1 d . A . 
C13 C 0.04506(15) 0.7640(3) 0.48527(13) 0.0156(4) Uani 1 1 d . . . 
C14 C 0.00608(15) 0.7706(3) 0.40353(12) 0.0158(4) Uani 1 1 d . A . 
C15 C 0.05639(15) 0.7245(3) 0.36029(12) 0.0161(4) Uani 1 1 d . . . 
C16 C 0.14508(15) 0.6884(3) 0.39940(12) 0.0158(4) Uani 1 1 d . A . 
C17 C -0.06999(17) 0.7006(3) 0.52912(15) 0.0285(6) Uani 1 1 d . . . 
H17A H -0.1076 0.6752 0.4750 0.043 Uiso 1 1 calc R A . 
H17B H -0.1058 0.7510 0.5553 0.043 Uiso 1 1 calc R . . 
H17C H -0.0434 0.6012 0.5566 0.043 Uiso 1 1 calc R . . 
C18 C -0.09855(16) 0.9473(3) 0.31524(13) 0.0217(5) Uani 1 1 d . . . 
H18A H -0.0566 1.0350 0.3381 0.033 Uiso 1 1 calc R . . 
H18B H -0.1589 0.9863 0.3032 0.033 Uiso 1 1 calc R . . 
H18C H -0.0925 0.9100 0.2671 0.033 Uiso 1 1 calc R . . 
C19 C -0.04788(17) 0.6037(3) 0.24736(14) 0.0244(5) Uani 1 1 d . . . 
H19A H -0.0246 0.4947 0.2626 0.037 Uiso 1 1 calc R A . 
H19B H -0.0717 0.6127 0.1903 0.037 Uiso 1 1 calc R . . 
H19C H -0.0950 0.6251 0.2669 0.037 Uiso 1 1 calc R . . 
 
loop_ 
 _atom_site_aniso_label 
 _atom_site_aniso_U_11 
 _atom_site_aniso_U_22 
 _atom_site_aniso_U_33 
 _atom_site_aniso_U_23 
 _atom_site_aniso_U_13 
 _atom_site_aniso_U_12 
Pd1 0.00968(10) 0.01754(10) 0.01550(9) 0.00383(6) 0.00251(6) 0.00075(7) 
N1 0.0150(10) 0.0220(10) 0.0176(9) 0.0016(8) 0.0037(8) 0.0008(8) 
O1 0.0131(8) 0.0218(8) 0.0218(8) 0.0073(6) 0.0051(6) 0.0020(6) 
O2 0.0118(8) 0.0239(8) 0.0226(8) 0.0050(7) 0.0021(6) 0.0011(7) 
N3 0.0160(11) 0.0239(10) 0.0146(9) 0.0013(7) 0.0042(8) 0.0045(8) 
O3 0.0163(9) 0.0352(10) 0.0202(8) -0.0060(7) 0.0012(7) -0.0019(8) 
O4 0.0248(10) 0.0397(11) 0.0182(8) 0.0076(7) 0.0080(7) -0.0017(8) 
N2 0.0179(11) 0.0279(11) 0.0166(9) 0.0020(8) 0.0045(8) 0.0050(9) 
O7 0.0158(9) 0.0276(9) 0.0119(7) 0.0009(6) 0.0019(6) -0.0025(7) 
O8 0.0113(8) 0.0275(8) 0.0210(8) 0.0083(7) 0.0042(6) 0.0027(7) 
O9 0.0171(9) 0.0238(8) 0.0201(8) -0.0004(6) 0.0096(7) 0.0004(7) 
C1 0.0185(12) 0.0202(11) 0.0153(10) 0.0006(8) 0.0065(9) 0.0012(9) 
C2 0.0174(12) 0.0195(11) 0.0143(10) 0.0019(8) 0.0017(9) 0.0034(9) 
C3 0.0159(12) 0.0181(11) 0.0158(10) -0.0021(8) 0.0017(8) 0.0014(9) 
C4 0.0195(14) 0.0342(14) 0.0330(14) 0.0169(11) 0.0079(11) 0.0030(11) 
C5 0.0157(13) 0.0242(13) 0.0381(14) 0.0082(11) 0.0007(11) 0.0014(10) 
C6 0.0103(11) 0.0230(11) 0.0166(10) 0.0019(9) 0.0033(8) 0.0019(9) 
C7 0.0230(13) 0.0178(11) 0.0180(10) 0.0044(9) 0.0075(9) 0.0003(9) 
C8 0.0291(16) 0.0342(15) 0.0419(16) 0.0166(12) 0.0027(13) 0.0061(12) 
C9 0.057(2) 0.0351(15) 0.0327(14) 0.0127(12) 0.0304(14) 0.0140(14) 
C10 0.0499(19) 0.0270(14) 0.0255(13) -0.0014(11) 0.0113(12) -0.0130(13) 
C11 0.0131(11) 0.0145(10) 0.0159(10) 0.0017(8) 0.0029(8) -0.0016(8) 
C12 0.0152(12) 0.0172(11) 0.0101(9) 0.0018(8) 0.0016(8) -0.0017(8) 
C13 0.0136(11) 0.0159(10) 0.0188(10) 0.0007(8) 0.0079(9) -0.0011(8) 
C14 0.0107(11) 0.0169(10) 0.0182(10) 0.0028(8) 0.0035(8) 0.0001(8) 
C15 0.0149(12) 0.0174(11) 0.0142(10) 0.0002(8) 0.0035(8) -0.0020(9) 
C16 0.0141(12) 0.0162(10) 0.0169(10) 0.0006(8) 0.0055(9) 0.0005(9) 
C17 0.0195(14) 0.0396(15) 0.0309(13) 0.0013(11) 0.0144(11) -0.0051(11) 
C18 0.0181(13) 0.0212(12) 0.0234(11) 0.0055(9) 0.0052(9) 0.0048(9) 
C19 0.0192(13) 0.0286(13) 0.0221(11) -0.0086(10) 0.0039(10) -0.0033(10) 
 
_geom_special_details 
; 
 All esds (except the esd in the dihedral angle between two l.s. planes) 
 are estimated using the full covariance matrix.  The cell esds are taken 
 into account individually in the estimation of esds in distances, angles 
 and torsion angles; correlations between esds in cell parameters are only 
 used when they are defined by crystal symmetry.  An approximate (isotropic) 
 treatment of cell esds is used for estimating esds involving l.s. planes. 
; 
 
loop_ 
 _geom_bond_atom_site_label_1 
 _geom_bond_atom_site_label_2 
 _geom_bond_distance 
 _geom_bond_site_symmetry_2 
 _geom_bond_publ_flag 
Pd1 C6 1.927(2) . ? 
Pd1 C11 2.002(2) . ? 
Pd1 O1 2.0098(16) . ? 
Pd1 O2 2.0519(16) . ? 
N1 C6 1.143(3) . ? 
N1 C7 1.474(3) . ? 
O1 C1 1.280(3) . ? 
O2 C3 1.271(3) . ? 
N3 O4 1.222(3) . ? 
N3 O3 1.229(3) . ? 
N3 C12 1.477(3) . ? 
N2 O6' 1.126(6) . ? 
N2 O5 1.185(4) . ? 
N2 O6 1.279(4) . ? 
N2 O5' 1.301(6) . ? 
N2 C16 1.482(3) . ? 
O7 C15 1.373(2) . ? 
O7 C19 1.443(3) . ? 
O8 C14 1.363(3) . ? 
O8 C18 1.444(3) . ? 
O9 C13 1.360(3) . ? 
O9 C17 1.449(3) . ? 
C1 C2 1.390(3) . ? 
C1 C4 1.499(3) . ? 
C2 C3 1.398(3) . ? 
C3 C5 1.502(3) . ? 
C7 C9 1.518(3) . ? 
C7 C10 1.519(3) . ? 
C7 C8 1.521(4) . ? 
C11 C16 1.389(3) . ? 
C11 C12 1.390(3) . ? 
C12 C13 1.394(3) . ? 
C13 C14 1.403(3) . ? 
C14 C15 1.396(3) . ? 
C15 C16 1.387(3) . ? 
 
loop_ 
 _geom_angle_atom_site_label_1 
 _geom_angle_atom_site_label_2 
 _geom_angle_atom_site_label_3 
 _geom_angle 
 _geom_angle_site_symmetry_1 
 _geom_angle_site_symmetry_3 
 _geom_angle_publ_flag 
C6 Pd1 C11 86.68(9) . . ? 
C6 Pd1 O1 174.59(8) . . ? 
C11 Pd1 O1 88.02(8) . . ? 
C6 Pd1 O2 92.92(8) . . ? 
C11 Pd1 O2 179.23(8) . . ? 
O1 Pd1 O2 92.36(6) . . ? 
C6 N1 C7 174.3(2) . . ? 
C1 O1 Pd1 124.31(15) . . ? 
C3 O2 Pd1 123.49(15) . . ? 
O4 N3 O3 124.27(19) . . ? 
O4 N3 C12 117.59(19) . . ? 
O3 N3 C12 118.14(19) . . ? 
O6' N2 O5 110.6(4) . . ? 
O6' N2 O6 16.8(4) . . ? 
O5 N2 O6 125.0(3) . . ? 
O6' N2 O5' 120.9(4) . . ? 
O5 N2 O5' 27.9(3) . . ? 
O6 N2 O5' 128.5(3) . . ? 
O6' N2 C16 126.4(4) . . ? 
O5 N2 C16 120.1(2) . . ? 
O6 N2 C16 114.5(3) . . ? 
O5' N2 C16 112.2(3) . . ? 
C15 O7 C19 114.22(17) . . ? 
C14 O8 C18 115.48(17) . . ? 
C13 O9 C17 114.74(18) . . ? 
O1 C1 C2 126.4(2) . . ? 
O1 C1 C4 114.3(2) . . ? 
C2 C1 C4 119.3(2) . . ? 
C1 C2 C3 126.9(2) . . ? 
O2 C3 C2 126.3(2) . . ? 
O2 C3 C5 114.9(2) . . ? 
C2 C3 C5 118.8(2) . . ? 
N1 C6 Pd1 176.5(2) . . ? 
N1 C7 C9 107.60(19) . . ? 
N1 C7 C10 107.72(18) . . ? 
C9 C7 C10 111.7(2) . . ? 
N1 C7 C8 106.6(2) . . ? 
C9 C7 C8 111.4(2) . . ? 
C10 C7 C8 111.5(2) . . ? 
C16 C11 C12 113.0(2) . . ? 
C16 C11 Pd1 124.43(17) . . ? 
C12 C11 Pd1 122.51(15) . . ? 
C11 C12 C13 125.16(19) . . ? 
C11 C12 N3 118.30(19) . . ? 
C13 C12 N3 116.53(19) . . ? 
O9 C13 C12 120.45(19) . . ? 
O9 C13 C14 120.7(2) . . ? 
C12 C13 C14 118.6(2) . . ? 
O8 C14 C15 123.11(19) . . ? 
O8 C14 C13 118.3(2) . . ? 
C15 C14 C13 118.6(2) . . ? 
O7 C15 C16 118.6(2) . . ? 
O7 C15 C14 122.5(2) . . ? 
C16 C15 C14 118.93(19) . . ? 
C15 C16 C11 125.4(2) . . ? 
C15 C16 N2 115.75(18) . . ? 
C11 C16 N2 118.8(2) . . ? 
 
_diffrn_measured_fraction_theta_max    0.937 
_diffrn_reflns_theta_full              26.00 
_diffrn_measured_fraction_theta_full   0.991 
_refine_diff_density_max    0.819 
_refine_diff_density_min   -0.347 
_refine_diff_density_rms    0.085 
